# Supplementary material
Source: PubMed Central journal article supplement (PMC7095191)
Supplement: 41586_2016_BFnature17180_MOESM107_ESM.pdf [file 41586_2016_BFnature17180_MOESM107_ESM.pdf]

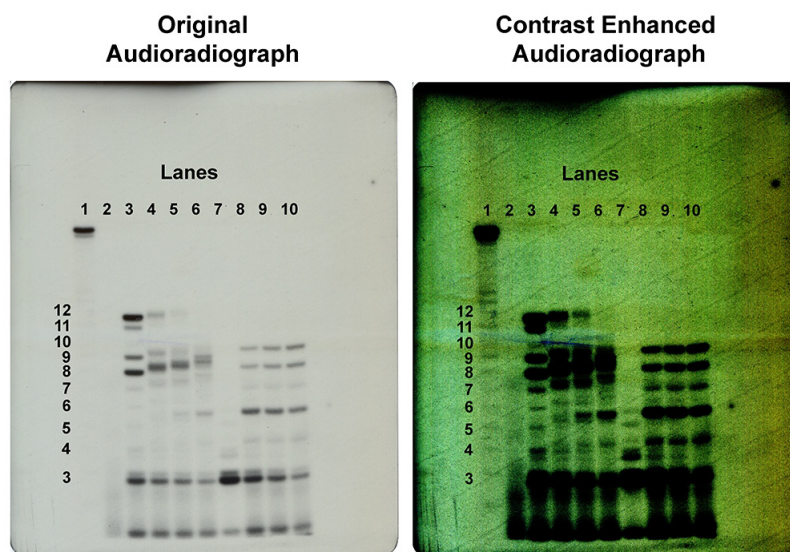

- Lanes**
- 1: Ladder (# of bases)
  - 2: ATP only
  - 3: RSV Pol + ATP
  - 4: RSV Pol + ATP + 10  $\mu$ M NTP
  - 5: RSV Pol + ATP + 30  $\mu$ M NTP
  - 6: RSV Pol + ATP + 100  $\mu$ M NTP
  - 7: RSV Pol
  - 8: RSV Pol + 10  $\mu$ M NTP
  - 9: RSV Pol + 30  $\mu$ M NTP
  - 10: RSV Pol + 100  $\mu$ M NTP

Figure 1f generated by cropping lane 1 from image

| Virus                                       | Antibodies for Immune Staining                        |                                |                                                           |
|---------------------------------------------|-------------------------------------------------------|--------------------------------|-----------------------------------------------------------|
|                                             | Primary Antibody                                      | Secondary Antibody             | Cell Staining                                             |
| Ebola virus (EBOV)                          | mm 6D8 anti-GP                                        |                                |                                                           |
| Marburg virus (MARV)                        | mm 9G4 anti-GP                                        |                                |                                                           |
| Venezuelan equine encephalitis virus (VEEV) | mm 1A4A anti-E2                                       | DyLight 488<br>anti-mouse-IgG  | Draq5 (Nuclei)                                            |
| Chikungunya virus (CHIK)                    | mm 2D21-1 anti-E2                                     |                                |                                                           |
| Lassa virus (LASV)                          | mm L52-161-6 anti-GP                                  |                                |                                                           |
| Junín virus (JUNV)                          | mmY-GQC03_BF11<br>anti-GP                             |                                |                                                           |
| Middle East respiratory syndrome (MERS)     | 40069-RP02 rb - HCoV-<br>EMC/2012 spike(S)<br>protein | DyLight 488<br>anti-rabbit-IgG | Draq5 and<br>33342Hoechst,<br>CellMask red<br>(Cytoplasm) |
